# Supplementary material for: Research Progress, Hotspots, and Evolution of Nighttime Light Pollution: Analysis Based on WOS Database and Remote Sensing Data
Source: MDPI journal article supplement (doi:10.3390/rs15092305), 2023-04-27
Supplement: s1 [file s1]

**Table S1. Research direction count table.**

| <b>Research Direction</b>                | <b>Record Number</b> | <b>Percentile of 719</b> |
|------------------------------------------|----------------------|--------------------------|
| Environmental Sciences Ecology           | 548                  | 76.217                   |
| Zoology                                  | 343                  | 47.705                   |
| Behavioral Sciences                      | 263                  | 36.579                   |
| Public Environmental Occupational Health | 241                  | 33.519                   |
| Physiology                               | 195                  | 27.121                   |
| Biodiversity Conservation                | 187                  | 26.008                   |
| Reproductive Biology                     | 110                  | 15.299                   |
| Science Technology Other Topics          | 109                  | 15.16                    |
| Meteorology Atmospheric Sciences         | 107                  | 14.882                   |
| Life Sciences Biomedicine Other Topics   | 96                   | 13.352                   |
| Biochemistry Molecular Biology           | 92                   | 12.796                   |
| Nutrition Dietetics                      | 91                   | 12.656                   |
| Toxicology                               | 90                   | 12.517                   |
| Instruments Instrumentation              | 86                   | 11.961                   |
| Marine Freshwater Biology                | 75                   | 10.431                   |
| Endocrinology Metabolism                 | 72                   | 10.014                   |
| Geography                                | 66                   | 9.179                    |
| Remote Sensing                           | 63                   | 8.762                    |
| Neurosciences Neurology                  | 62                   | 8.623                    |
| Geochemistry Geophysics                  | 56                   | 7.789                    |
| Imaging Science Photographic Technology  | 56                   | 7.789                    |
| Entomology                               | 55                   | 7.65                     |
| Anthropology                             | 54                   | 7.51                     |
| Genetics Heredity                        | 54                   | 7.51                     |
| Geology                                  | 51                   | 7.093                    |
| Psychology                               | 49                   | 6.815                    |
| Physical Sciences Other Topics           | 47                   | 6.537                    |
| Plant Sciences                           | 47                   | 6.537                    |
| Developmental Biology                    | 46                   | 6.398                    |
| Computer Science                         | 44                   | 6.12                     |
| Communication                            | 43                   | 5.981                    |
| Astronomy Astrophysics                   | 40                   | 5.563                    |
| Engineering                              | 40                   | 5.563                    |
| Chemistry                                | 38                   | 5.285                    |
| Evolutionary Biology                     | 38                   | 5.285                    |
| Mathematics                              | 38                   | 5.285                    |
| Optics                                   | 37                   | 5.146                    |
| Anatomy Morphology                       | 34                   | 4.729                    |
| Energy Fuels                             | 34                   | 4.729                    |
| Forestry                                 | 27                   | 3.755                    |

| <b>Research Direction</b>          | <b>Record Number</b> | <b>Percentile of 719</b> |
|------------------------------------|----------------------|--------------------------|
| Physical Geography                 | 27                   | 3.755                    |
| Immunology                         | 26                   | 3.616                    |
| Water Resources                    | 26                   | 3.616                    |
| Pathology                          | 25                   | 3.477                    |
| Urban Studies                      | 25                   | 3.477                    |
| Business Economics                 | 24                   | 3.338                    |
| Agriculture                        | 23                   | 3.199                    |
| Oncology                           | 19                   | 2.643                    |
| Spectroscopy                       | 19                   | 2.643                    |
| Health Care Sciences Services      | 18                   | 2.503                    |
| Mathematical Computational Biology | 18                   | 2.503                    |
| Sociology                          | 18                   | 2.503                    |
| Physics                            | 17                   | 2.364                    |
| Infectious Diseases                | 16                   | 2.225                    |
| Psychiatry                         | 16                   | 2.225                    |
| Demography                         | 13                   | 1.808                    |
| Fisheries                          | 13                   | 1.808                    |
| Pharmacology Pharmacy              | 13                   | 1.808                    |
| Cell Biology                       | 12                   | 1.669                    |
| Social Sciences Other Topics       | 11                   | 1.53                     |
| Cardiovascular System Cardiology   | 10                   | 1.391                    |
| Obstetrics Gynecology              | 10                   | 1.391                    |
| Automation Control Systems         | 9                    | 1.252                    |
| Gastroenterology Hepatology        | 9                    | 1.252                    |
| Microbiology                       | 9                    | 1.252                    |
| Biophysics                         | 8                    | 1.113                    |
| Pediatrics                         | 8                    | 1.113                    |
| Veterinary Sciences                | 8                    | 1.113                    |
| Acoustics                          | 7                    | 0.974                    |
| Dermatology                        | 7                    | 0.974                    |
| Education Educational Research     | 7                    | 0.974                    |
| Hematology                         | 7                    | 0.974                    |
| Parasitology                       | 7                    | 0.974                    |
| Public Administration              | 7                    | 0.974                    |
| Social Issues                      | 7                    | 0.974                    |
| Food Science Technology            | 6                    | 0.834                    |
| General Internal Medicine          | 6                    | 0.834                    |
| Government Law                     | 6                    | 0.834                    |
| Oceanography                       | 6                    | 0.834                    |
| Research Experimental Medicine     | 6                    | 0.834                    |
| Construction Building Technology   | 5                    | 0.695                    |

| <b>Research Direction</b>               | <b>Record Number</b> | <b>Percentile of 719</b> |
|-----------------------------------------|----------------------|--------------------------|
| Geriatrics Gerontology                  | 5                    | 0.695                    |
| Telecommunications                      | 5                    | 0.695                    |
| Urology Nephrology                      | 5                    | 0.695                    |
| Allergy                                 | 4                    | 0.556                    |
| Information Science Library Science     | 4                    | 0.556                    |
| Medical Laboratory Technology           | 4                    | 0.556                    |
| Ophthalmology                           | 4                    | 0.556                    |
| Mycology                                | 3                    | 0.417                    |
| Respiratory System                      | 3                    | 0.417                    |
| Robotics                                | 3                    | 0.417                    |
| Arts Humanities Other Topics            | 2                    | 0.278                    |
| Biotechnology Applied Microbiology      | 2                    | 0.278                    |
| History                                 | 2                    | 0.278                    |
| History Philosophy Of Science           | 2                    | 0.278                    |
| Materials Science                       | 2                    | 0.278                    |
| Mechanics                               | 2                    | 0.278                    |
| Mining Mineral Processing               | 2                    | 0.278                    |
| Virology                                | 2                    | 0.278                    |
| Emergency Medicine                      | 1                    | 0.139                    |
| Film Radio Television                   | 1                    | 0.139                    |
| Integrative Complementary Medicine      | 1                    | 0.139                    |
| Mathematical Methods In Social Sciences | 1                    | 0.139                    |
| Medical Ethics                          | 1                    | 0.139                    |
| Medical Informatics                     | 1                    | 0.139                    |
| Metallurgy Metallurgical Engineering    | 1                    | 0.139                    |
| Microscopy                              | 1                    | 0.139                    |
| Mineralogy                              | 1                    | 0.139                    |
| Nuclear Science Technology              | 1                    | 0.139                    |
| Operations Research Management Science  | 1                    | 0.139                    |
| Paleontology                            | 1                    | 0.139                    |
| Philosophy                              | 1                    | 0.139                    |
| Sport Sciences                          | 1                    | 0.139                    |
| Transportation                          | 1                    | 0.139                    |
| Tropical Medicine                       | 1                    | 0.139                    |

**Table S2. Table of the number of literatures published in each country.**

| <b>Country/Region</b> | <b>Record Number</b> | <b>Continent</b> | <b>Developed Country or not</b> |
|-----------------------|----------------------|------------------|---------------------------------|
| USA                   | 167                  | North America    | Yes                             |
| Germany               | 117                  | Europe           | Yes                             |
| UK                    | 104                  | Europe           | Yes                             |
| China                 | 76                   | Asia             | No                              |
| Australia             | 54                   | Oceania          | Yes                             |
| Spain                 | 52                   | Europe           | Yes                             |
| Italy                 | 51                   | Europe           | Yes                             |
| Netherlands           | 46                   | Europe           | Yes                             |
| Canada                | 43                   | North America    | Yes                             |
| France                | 43                   | Europe           | Yes                             |
| Israel                | 43                   | Asia             | Yes                             |
| Slovakia              | 25                   | Europe           | Yes                             |
| Poland                | 21                   | Europe           | No                              |
| Mexico                | 16                   | North America    | No                              |
| Switzerland           | 16                   | Europe           | Yes                             |
| Chile                 | 15                   | South America    | No                              |
| Belgium               | 13                   | Europe           | Yes                             |
| Hungary               | 12                   | Europe           | No                              |
| India                 | 12                   | Asia             | No                              |
| Sweden                | 11                   | Europe           | Yes                             |
| Austria               | 10                   | Europe           | Yes                             |
| Brazil                | 9                    | South America    | No                              |
| Finland               | 9                    | Europe           | Yes                             |
| South Korea           | 9                    | Asia             | Yes                             |
| Japan                 | 8                    | Asia             | Yes                             |
| Argentina             | 7                    | South America    | No                              |
| Greece                | 7                    | Europe           | Yes                             |
| New Zealand           | 7                    | Oceania          | Yes                             |
| Portugal              | 7                    | Europe           | Yes                             |
| Indonesia             | 6                    | Asia             | No                              |
| South Africa          | 5                    | Africa           | No                              |
| Egypt                 | 4                    | Africa           | No                              |
| Estonia               | 4                    | Europe           | Yes                             |
| Norway                | 4                    | Europe           | Yes                             |
| Czech Republic        | 3                    | Europe           | Yes                             |
| Ireland               | 3                    | Europe           | Yes                             |
| Russia                | 3                    | Europe           | No                              |
| Colombia              | 2                    | South America    | No                              |
| Croatia               | 2                    | Europe           | Yes                             |
| Denmark               | 2                    | Europe           | Yes                             |

| Country/Region                                                                                                                                                                                                                                                                                                                | Record Number | Continent     | Developed Country or not |
|-------------------------------------------------------------------------------------------------------------------------------------------------------------------------------------------------------------------------------------------------------------------------------------------------------------------------------|---------------|---------------|--------------------------|
| Latvia                                                                                                                                                                                                                                                                                                                        | 2             | Europe        | Yes                      |
| Monaco                                                                                                                                                                                                                                                                                                                        | 2             | Europe        | Yes                      |
| Panama                                                                                                                                                                                                                                                                                                                        | 2             | North America | No                       |
| Philippines                                                                                                                                                                                                                                                                                                                   | 2             | Asia          | No                       |
| Serbia                                                                                                                                                                                                                                                                                                                        | 2             | Europe        | No                       |
| Ukraine                                                                                                                                                                                                                                                                                                                       | 2             | Europe        | No                       |
| Antigua and Barbuda                                                                                                                                                                                                                                                                                                           | 1             | North America | No                       |
| Barbados                                                                                                                                                                                                                                                                                                                      | 1             | North America | No                       |
| Bulgaria                                                                                                                                                                                                                                                                                                                      | 1             | Europe        | No                       |
| Ecuador                                                                                                                                                                                                                                                                                                                       | 1             | South America | No                       |
| Kenya                                                                                                                                                                                                                                                                                                                         | 1             | Africa        | No                       |
| Malaysia                                                                                                                                                                                                                                                                                                                      | 1             | Asia          | No                       |
| Montenegro                                                                                                                                                                                                                                                                                                                    | 1             | Europe        | No                       |
| Peru                                                                                                                                                                                                                                                                                                                          | 1             | South America | No                       |
| Romania                                                                                                                                                                                                                                                                                                                       | 1             | Europe        | No                       |
| Saudi Arabia                                                                                                                                                                                                                                                                                                                  | 1             | Asia          | No                       |
| Singapore                                                                                                                                                                                                                                                                                                                     | 1             | Asia          | Yes                      |
| Slovenia                                                                                                                                                                                                                                                                                                                      | 1             | Europe        | Yes                      |
| <b>Note:</b> Classification of countries based on: information published by the World Bank, the International Monetary Fund, the United Nations Development Program, the U.S. Central Intelligence Agency, etc. <a href="https://en.wikipedia.org/wiki/Developed_country">https://en.wikipedia.org/wiki/Developed_country</a> |               |               |                          |

**Table S3. Visual word list based on VOSviewer.**

| <b>Label</b>    | <b>Cluster</b> | <b>Weight&lt;Total link strength&gt;</b> |
|-----------------|----------------|------------------------------------------|
| Activity        | 1              | 44                                       |
| ALAN            | 5              | 344                                      |
| Attraction      | 1              | 60                                       |
| Bat             | 1              | 31                                       |
| Behavior        | 1              | 216                                      |
| Biodiversity    | 1              | 105                                      |
| Bird            | 1              | 60                                       |
| Brightness      | 2              | 241                                      |
| Cancer          | 3              | 43                                       |
| Climate change  | 4              | 37                                       |
| Color           | 2              | 71                                       |
| Conservation    | 1              | 65                                       |
| Dark sky        | 2              | 55                                       |
| Dim light       | 3              | 91                                       |
| Disturbance     | 3              | 60                                       |
| Diversity       | 1              | 51                                       |
| DMSP-OLS        | 2              | 37                                       |
| Dynamic         | 2              | 64                                       |
| Ecosystem       | 2              | 81                                       |
| Electricity     | 2              | 31                                       |
| Satellite       | 2              | 34                                       |
| Evolution       | 1              | 61                                       |
| Exposure        | 3              | 148                                      |
| Growth          | 4              | 74                                       |
| Habitat         | 1              | 51                                       |
| Health          | 3              | 31                                       |
| Impact          | 5              | 326                                      |
| Stress          | 3              | 31                                       |
| Insect          | 1              | 76                                       |
| Light pollution | 5              | 567                                      |
| Melatonin       | 3              | 169                                      |
| Modelling       | 2              | 65                                       |
| Moonlight       | 1              | 28                                       |
| Mortality       | 1              | 40                                       |
| Nighttime       | 5              | 327                                      |
| NTL             | 2              | 49                                       |
| Orientation     | 1              | 54                                       |
| Pattern         | 1              | 73                                       |
| Photoperiod     | 4              | 44                                       |
| Phytophysiology | 4              | 45                                       |
| Population      | 2              | 58                                       |

| <b>Label</b>         | <b>Cluster</b> | <b>Weight&lt;Total link strength&gt;</b> |
|----------------------|----------------|------------------------------------------|
| Predation            | 1              | 100                                      |
| Remote sensing       | 2              | 60                                       |
| Response             | 4              | 174                                      |
| Rhythm               | 3              | 52                                       |
| Turtle               | 1              | 44                                       |
| Risk                 | 3              | 50                                       |
| Accident             | 3              | 41                                       |
| Skyglow              | 2              | 49                                       |
| Sleep                | 3              | 50                                       |
| Spectral composition | 4              | 35                                       |
| Pollination          | 4              | 33                                       |
| NPP-VIIRS            | 2              | 45                                       |
| Trend                | 2              | 24                                       |
| Urbanization         | 2              | 105                                      |

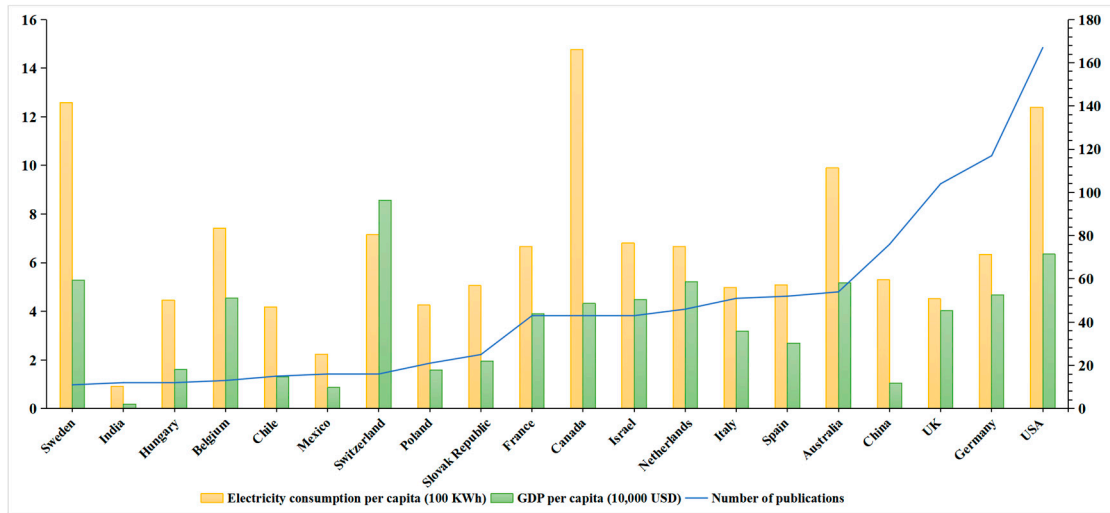

**Figure S1. Per capita values of electricity consumption and GDP and number of literatures published by country.**



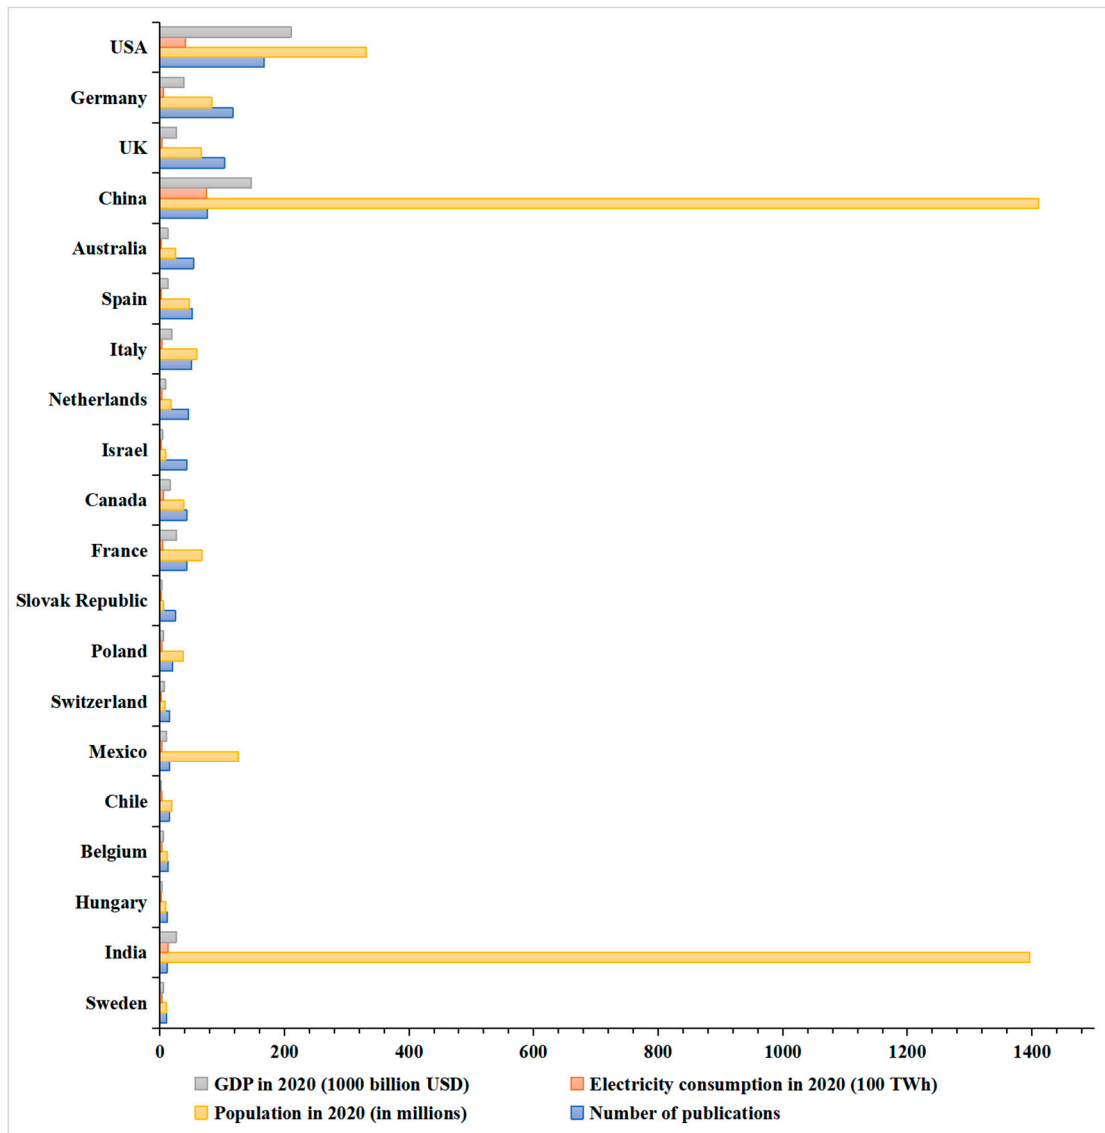

**Figure S2. Total value of electricity consumption, GDP and population, and number of literatures published by country.**
